# Supplementary material
Source: PubMed Central journal article supplement (PMC10099523)
Supplement: EJN-57-78-s001.pdf [file EJN-57-78-s001.pdf]

Supplementary material to:

## Test-retest reliability of a finger-tapping fMRI task in a healthy population

---

Florian Wüthrich<sup>1-3</sup>, Stephanie Lefebvre<sup>1,2</sup>, Niluja Nadesalingam<sup>1-3</sup>, Jessica A. Bernard<sup>4</sup>, Vijay A. Mittal<sup>5-9</sup>, Stewart A. Shankman<sup>5,6</sup>, Sebastian Walther<sup>1,2</sup>

<sup>1</sup> Translational Research Center, University Hospital of Psychiatry and Psychotherapy, University of Bern, Switzerland

<sup>2</sup> Translational Imaging Center (TIC), Swiss Institute for Translational and Entrepreneurial Medicine, Bern, Switzerland

<sup>3</sup> Graduate School for Health Sciences, University of Bern, Switzerland

<sup>4</sup> Texas A&M University, Department of Psychological and Brain Sciences, Texas A&M Institute for Neuroscience, Texas A&M University, College Station, TX, USA

<sup>5</sup> Northwestern University, Department of Psychiatry and Behavioral Sciences, Chicago, IL, USA.

<sup>6</sup> Northwestern University, Department of Psychology, Evanston, IL, USA

<sup>7</sup> Northwestern University, Institute for Innovations in Developmental Sciences, Evanston/Chicago, IL, USA

<sup>8</sup> Northwestern University, Institute for Policy Research, Evanston, IL, USA

<sup>9</sup> Northwestern University, Medical Social Sciences, Chicago, IL, USA

---

## Test-retest reliability in literature based regions of interest

| x y z       | Region           | ICC TIF<br>(95%-CI) | ICC TIFfast<br>(95%-CI) | ICC TAF<br>(95%-CI) | ICC TAFfast<br>(95%-CI) | ICC AIC<br>(95%-CI) |
|-------------|------------------|---------------------|-------------------------|---------------------|-------------------------|---------------------|
| -26 -54 -26 | Left cerebellum  | .47<br>(.02, .71)   | .39<br>(-.13, .67)      | .44<br>(-.04, .69)  | .52<br>(.11, .74)       | .52<br>(.12, .74)   |
| -38 -24 56  | Left M1          | .72<br>(.49, .85)   | .59<br>(.24, .78)       | .53<br>(.13, .74)   | .53<br>(.13, .74)       | .58<br>(.22, .77)   |
| -26 4 60    | Left PMd         | .65<br>(.35, .81)   | .19<br>(-.49, .56)      | .55<br>(.16, .75)   | .46<br>(.00, .70)       | .46<br>(.02, .71)   |
| -26 4 2     | Left putamen     | .42<br>(-.07, .69)  | .57<br>(.21, .77)       | .54<br>(.15, .75)   | .67<br>(.39, .82)       | .62<br>(.30, .79)   |
| -32 -24 62  | Left S1          | .71<br>(.47, .84)   | .71<br>(.46, .84)       | .70<br>(.44, .84)   | .78<br>(.59, .88)       | .74<br>(.53, .86)   |
| -30 -56 64  | Left SPL         | .59<br>(.25, .78)   | .22<br>(-.43, .58)      | .57<br>(.21, .77)   | .37<br>(-.17, .66)      | .65<br>(.36, .81)   |
| -12 -20 10  | Left Thalamus    | .42<br>(-.07, .68)  | .40<br>(-.10, .67)      | .04<br>(-.77, .48)  | .41<br>(-.09, .68)      | .33<br>(-.23, .64)  |
| 0 -2 54     | Bilateral SMA    | .44<br>(-.02, .70)  | .69<br>(.43, .83)       | .44<br>(-.04, .69)  | .44<br>(-.04, .69)      | .51<br>(.09, .73)   |
| 26 -54 -26  | Right cerebellum | .31<br>(-.28, .62)  | .56<br>(.19, .76)       | .43<br>(-.05, .69)  | .69<br>(.43, .83)       | .62<br>(.30, .79)   |
| 38 -24 56   | Right M1         | .57<br>(.22, .77)   | .91<br>(.83, .95)       | .68<br>(.42, .83)   | .80<br>(.62, .89)       | .85<br>(.72, .92)   |
| 26 4 60     | Right PMd        | .48<br>(.04, .72)   | .41<br>(-.09, .68)      | .21<br>(-.46, .57)  | .58<br>(.23, .77)       | .64<br>(.34, .81)   |
| 26 4 2      | Right putamen    | .32<br>(-.26, .63)  | .54<br>(.16, .75)       | .43<br>(-.05, .69)  | .43<br>(-.04, .69)      | .60<br>(.27, .78)   |
| 32 -24 62   | Right S1         | .52<br>(.11, .74)   | .88<br>(.78, .93)       | .46<br>(.02, .71)   | .84<br>(.70, .91)       | .84<br>(.71, .92)   |
| 30 -56 64   | Right SPL        | .35<br>(-.20, .64)  | .49<br>(.06, .72)       | .51<br>(.11, .74)   | .30<br>(-.28, .62)      | .65<br>(.36, .81)   |
| 12 -20 10   | Right Thalamus   | .24<br>(-.40, .59)  | .50<br>(.08, .73)       | .19<br>(-.48, .56)  | .20<br>(-.47, .57)      | .47<br>(.02, .71)   |

ROI: region of interest; ALE: activation likelihood estimation; ICC: intraclass correlation coefficient; TIF: paced thumb-index finger tapping; TAF: paced thumb alternating finger opposition; TIF/TAFfast: unpaced condition with movement as fast as possible; M1: primary motor cortex; PMd: dorsal premotor cortex; S1: primary sensory cortex; SPL: superior parietal lobule; SMA: supplementary motor area. M1 and S1 ROIs share 40% of their volume.  
Color-coding for ICC-values: red: 0 - .39 (poor); yellow: .40 - .59 (fair); light green: .60 - .75(good); dark green: >.75 (excellent)

## Test-retest reliability in anatomical atlas based regions of interest

| Region                 | ICC TIF<br>(95%-CI) | ICC TIFfast<br>(95%-CI) | ICC TAF<br>(95%-CI) | ICC TAFfast<br>(95%-CI) | ICC AICC<br>(95%-CI) |
|------------------------|---------------------|-------------------------|---------------------|-------------------------|----------------------|
| Left cerebellum IV-VI  | .55 (.18, .76)      | .66 (.37, .81)          | .45 (-.01, .70)     | .62 (.31, .80)          | .72 (.48, .85)       |
| Left M1                | .64 (.34, .81)      | .52 (.12, .74)          | .24 (-.40, .59)     | .57 (.20, .76)          | .48 (.05, .72)       |
| Left putamen           | .44 (-.02, .70)     | .58 (.22, .77)          | .73 (.51, .85)      | .66 (.38, .82)          | .64 (.34, .81)       |
| Left S1                | .60 (.26, .78)      | .67 (.40, .82)          | .45 (-.01, .70)     | .57 (.21, .77)          | .66 (.37, .82)       |
| Left SMA               | .48 (.05, .72)      | .66 (.38, .82)          | .22 (-.44, .58)     | .45 (-.01, .70)         | .68 (.41, .83)       |
| Left SPL               | .59 (.24, .78)      | .47 (.02, .71)          | .39 (-.13, .67)     | .31 (-.27, .63)         | .46 (.00, .71)       |
| Left thalamus          | .38 (-.14, .66)     | .54 (.15, .75)          | .09 (-.68, .50)     | .56 (.18, .76)          | .53 (.14, .75)       |
| Right cerebellum IV-VI | .69 (.43, .83)      | .60 (.27, .78)          | .40 (-.10, .68)     | .60 (.26, .78)          | .73 (.50, .85)       |
| Right M1               | .52 (.12, .74)      | .77 (.57, .87)          | .08 (-.70, .50)     | .72 (.48, .85)          | .77 (.57, .87)       |
| Right putamen          | .46 (.00, .71)      | .53 (.14, .75)          | .31 (-.26, .63)     | .38 (-.14, .66)         | .58 (.23, .77)       |
| Right S1               | .47 (.02, .71)      | .81 (.65, .90)          | .41 (-.08, .68)     | .60 (.27, .78)          | .76 (.57, .87)       |
| Right SMA              | .55 (.17, .76)      | .74 (.53, .86)          | .43 (-.05, .69)     | .57 (.21, .77)          | .78 (.60, .88)       |
| Right SPL              | .48 (.04, .72)      | .60 (.26, .78)          | .30 (-.28, .62)     | .40 (-.10, .68)         | .59 (.24, .77)       |
| Right thalamus         | .51 (.10, .74)      | .55 (.18, .76)          | .17 (-.52, .55)     | .23 (-.43, .58)         | .50 (.09, .73)       |

ROI: region of interest; ICC: intraclass correlation coefficient; TIF: paced thumb-index finger tapping; TAF: paced thumb alternating finger opposition; TIF/TAFfast: unpaced condition with movement as fast as possible;  
M1: primary motor cortex; S1: primary sensory cortex; SMA: supplementary motor area; SPL: superior parietal lobule.  
Color-coding for ICC-values: red: 0 - .39 (poor); yellow: .40 - .59 (fair); light green: .60 - .75(good); dark green: >.75 (excellent)

## Test-retest reliability in regions of interest based on conjunction analysis of activations

| TIF               |                                             |                 | TAFfast           |                                                                             |                 |
|-------------------|---------------------------------------------|-----------------|-------------------|-----------------------------------------------------------------------------|-----------------|
| x y z (n voxels)  | Regions                                     | ICC (95%-CI)    | x y z (n voxel)   | Regions                                                                     | ICC (95%-CI)    |
| -35 -24 53 (626)  | Left M1, premotor cortex, S1                | .67 (.39, .82)  | -35 -24 53 (4451) | Left M1, S1, SII, SPL, IPL, bilateral SMA, premotor cortex                  | .35 (-.21, .64) |
| -3 -4 55 (109)    | Bilateral SMA                               | .50 (.08, .73)  | 20 -50 -22 (2355) | Bilateral cerebellum IV – VI, left VIII, IX, Fastigii ncl., interposed Ncl. | .66 (.37, .81)  |
| 20 -48 -22 (480)  | Right cerebellum                            | .54 (.16, .75)  | 58 -18 29 (1156)  | Right M1, SI, SII, SMG, IPL                                                 | .54 (.16, .75)  |
| -29 -50 -30 (31)  | Left cerebellum                             | .23 (-.42, .58) | -57 1 35 (777)    | Left IFG pars opercularis, anterior Insula, premotor cortex                 | .55 (.18, .76)  |
| -49 -24 19 (15)   | Left SII                                    | .29 (-.31, .61) | 44 3 5 (671)      | Right IFG pars opercularis, anterior Insula                                 | .52 (.12, .74)  |
| -45 1 9 (10)      | Left anterior insula                        | .64 (.33, .80)  | 40 -12 61 (360)   | Right premotor cortex                                                       | .64 (.33, .80)  |
| TIFfast           |                                             |                 | 18 -20 21 (46)    | Right thalamus                                                              | .40 (-.10, .67) |
| x y z (n voxel)   | Regions                                     | ICC (95%-CI)    | -27 -12 9 (33)    | Left putamen                                                                | .29 (-.30, .62) |
| -35 -24 55 (2019) | Left M1, premotor cortex, SI, SII           | .55 (.18, .76)  |                   |                                                                             |                 |
| 24 -50 -26 (1342) | Right cerebellum IV-VI, vermis              | .55 (.17, .76)  |                   |                                                                             |                 |
| 44 11 1 (484)     | Right IFG pars opercularis, anterior Insula | .64 (.34, .81)  |                   |                                                                             |                 |

|                      |                                            |                    |                      |                                                       |                    |
|----------------------|--------------------------------------------|--------------------|----------------------|-------------------------------------------------------|--------------------|
| -45 1 7<br>(388)     | Left IFG pars opercularis, anterior Insula | .70<br>(.45, .84)  | -17 -10 21<br>(11)   | Left thalamus                                         | .44<br>(-.04, .69) |
| -7 -12 51<br>(228)   | Left SMA                                   | .68<br>(.42, .83)  | -15 -20 5<br>(10)    | Left thalamus                                         | .61<br>(.28, .79)  |
| 54 -24 27<br>(161)   | Right rolandic operculum, SMG              | .71<br>(.46, .84)  | -31 -10 1<br>(7)     | Left putamen                                          | .21<br>(-.46, .57) |
| -59 7 29<br>(101)    | Left IFG pars opercularis                  | .38<br>(-.14, .66) | 2 17 35<br>(7)       | Right MCC                                             | .70<br>(.45, .84)  |
| -29 -52 -26<br>(73)  | Left cerebellum VI                         | .32<br>(-.26, .63) | AIIC                 |                                                       |                    |
| -31 -8 -2<br>(48)    | Left putamen                               | .18<br>(-.52, .55) | -35 -24 53<br>(4293) | Left M1, premotor cortex, S1, SII, IPL, bilateral SMA | .45<br>(-.01, .70) |
| 4 -2 67<br>(17)      | Right SMA                                  | .71<br>(.46, .84)  | 22 -48 -22<br>(2074) | Bilateral cerebellum IV – V, vermis                   | .57<br>(.20, .76)  |
| -7 5 41<br>(16)      | Left MCC                                   | .41<br>(-.09, .68) | 58 -18 29<br>(796)   | Right SMG, S1, SII, IPL                               | .67<br>(.39, .82)  |
| -15 -20 7<br>(13)    | Left thalamus                              | .65<br>(.36, .81)  | -59 7 27<br>(736)    | Left IFG pars opercularis, anterior Insula            | .66<br>(.37, .81)  |
| TAF                  |                                            |                    |                      |                                                       |                    |
| x y z<br>(n voxels)  | Regions                                    | ICC<br>(95%-CI)    | 40 5 5<br>(597)      | Right IFG pars opercularis, anterior Insula           | .59<br>(.24, .77)  |
| -35 -24 53<br>(2412) | Left M1, premotor, S1, IPL                 | .46<br>(.00, .71)  | -31 -10 1<br>(190)   | Left Putamen                                          | .58<br>(.22, .77)  |
| 20 -48 -22<br>(696)  | Right cerebellum IV – VI, vermis           | .47<br>(.02, .71)  | 40 -12 59<br>(102)   | Right M1                                              | .61<br>(.28, .79)  |
| 40 -38 53<br>(381)   | Right S1                                   | .62<br>(.30, .79)  | 54 1 43<br>(36)      | Right M1, premotor cortex                             | .74<br>(.52, .86)  |
| -3 -2 53<br>(341)    | Bilateral SMA                              | .50<br>(.08, .73)  | -17 -20 7<br>(17)    | Left thalamus                                         | .43<br>(-.06, .69) |
| -27 -54 -24<br>(197) | Left cerebellum V, VI                      | .42<br>(-.06, .69) | -17 -10 19<br>(10)   | Left thalamus                                         | .71<br>(.46, .84)  |
| -59 7 29<br>(65)     | Left IFG pars opercularis                  | .31<br>(-.27, .63) |                      |                                                       |                    |
| 52 -20 35<br>(47)    | Right S1, IPL                              | .53<br>(.13, .74)  |                      |                                                       |                    |
| 30 -6 61<br>(44)     | Right premotor cortex                      | .13<br>(-.59, .53) |                      |                                                       |                    |
| -41 -2 13<br>(43)    | Left anterior Insula                       | .56<br>(.19, .76)  |                      |                                                       |                    |
| 58 9 23<br>(38)      | Right IFG pars opercularis                 | .31<br>(-.28, .62) |                      |                                                       |                    |
| -25 -2 13<br>(21)    | Left putamen                               | .58<br>(.22, .77)  |                      |                                                       |                    |

ROI: region of interest; ICC: intraclass correlation coefficient; TIF: paced thumb-index finger tapping; TAF: paced thumb alternating finger opposition; TIF/TAFfast: unpaced condition with movement as fast as possible;

M1: primary motor cortex; S1: primary sensory cortex; SII: secondary sensory cortex; SMA: supplementary motor area; IFG: inferior frontal gyrus; IPL: inferior parietal lobule; SPL: superior parietal lobule; SMG: supramarginal gyrus; MCC: middle cingulate cortex.

Color-coding for ICC-values: red: 0 - .39 (poor); yellow: .40 - .59 (fair); light green: .60 - .75(good); dark green: >.75 (excellent)

## Age Groups

### Sample characteristics and performance

| Table S4                                                                                                                                                   | Younger half (n = 16)   |                          | Older half (n = 15)     |                          |
|------------------------------------------------------------------------------------------------------------------------------------------------------------|-------------------------|--------------------------|-------------------------|--------------------------|
|                                                                                                                                                            | Baseline<br>(Mean ± SD) | Follow-Up<br>(Mean ± SD) | Baseline<br>(Mean ± SD) | Follow-Up<br>(Mean ± SD) |
| Age (years)                                                                                                                                                | 25.7 ± 4.2              |                          | 46.3 ± 8.5              |                          |
| Sex (n, % female)                                                                                                                                          | 10 (62.5)               |                          | 6 (40)                  |                          |
| Education (years)                                                                                                                                          | 15.6 ± 3.2              |                          | 16.8 ± 3.5              |                          |
| TIFfast performance<br>(Taps/second)                                                                                                                       | 3.74 ± .90              | 3.83 ± .83               | 3.70 ± 1.43             | 3.88 ± 1.13              |
| TAFfast performance<br>(Taps/second)                                                                                                                       | 2.91 ± .72              | 3.02 ± .68               | 3.11 ± 1.12             | 3.08 ± 1.06              |
| TIF: Paced thumb-index finger tapping; TAF: paced thumb alternating finger opposition;<br>TIF/TAFfast: unpaced condition with movement as fast as possible |                         |                          |                         |                          |

### Dice similarity coefficients

| Table S5 - Dice Similarity Coefficients (DSC)                                                                                                                                                                                                                                                                                                                                  |       |      |         |      |       |      |         |      |       |      |
|--------------------------------------------------------------------------------------------------------------------------------------------------------------------------------------------------------------------------------------------------------------------------------------------------------------------------------------------------------------------------------|-------|------|---------|------|-------|------|---------|------|-------|------|
| Condition                                                                                                                                                                                                                                                                                                                                                                      | TIF   |      | TIFfast |      | TAF   |      | TAFfast |      | AllC  |      |
| Age group                                                                                                                                                                                                                                                                                                                                                                      | young | old  | young   | old  | young | old  | young   | old  | young | old  |
| Threshold<br>p=.05                                                                                                                                                                                                                                                                                                                                                             | .347  | .557 | .567    | .617 | .573  | .707 | .685    | .692 | .740  | .716 |
| Threshold<br>p=.001                                                                                                                                                                                                                                                                                                                                                            | .293  | .571 | .558    | .580 | .430  | .641 | .626    | .662 | .644  | .665 |
| Threshold<br>p <sub>FWE</sub> =.05                                                                                                                                                                                                                                                                                                                                             | .081  | 0*   | .462    | .512 | .145  | .282 | .385    | .463 | .444  | .491 |
| TIF: Paced thumb-index finger tapping; TAF: paced thumb alternating finger opposition;<br>TIF/TAFfast: unpaced condition with movement as fast as possible; AllC: Contrast of all tapping<br>conditions vs. all rest conditions; young: younger half of the study sample (n=16); old: older half of<br>the study sample (n=15); 0*: no overlapping activation between sessions |       |      |         |      |       |      |         |      |       |      |

Intraclass correlation coefficients

| Table S6 – Average ICC values per condition and age group |       |     |        |         |     |        |       |     |        |         |     |        |       |     |       |                      |     |        |
|-----------------------------------------------------------|-------|-----|--------|---------|-----|--------|-------|-----|--------|---------|-----|--------|-------|-----|-------|----------------------|-----|--------|
|                                                           | TIF   |     |        | TIFfast |     |        | TAF   |     |        | TAFfast |     |        | AllC  |     |       | mean of 5 conditions |     |        |
| Age group                                                 | young | old | stat   | young   | old | stat   | young | old | stat   | young   | old | stat   | young | old | stat  | young                | old | stat   |
| Literature                                                | .40   | .60 | p=.017 | .46     | .66 | p=.013 | .47   | .41 | p=.49  | .41     | .67 | p<.001 | .54   | .66 | p=.10 | .45                  | .60 | p<.001 |
| Anatomical                                                | .39   | .65 | p=.002 | .53     | .75 | p<.001 | .37   | .18 | p=.020 | .34     | .70 | p<.001 | .60   | .65 | p=.41 | .45                  | .59 | p<.001 |
| Conjunction                                               | .43   | .60 | p=.20  | .48     | .62 | p=.12  | .45   | .46 | p=.93  | .39     | .58 | p=.06  | .60   | .60 | p=.97 | .47                  | .57 | p=.023 |

TIF: Paced thumb-index finger tapping; TAF: paced thumb alternating finger opposition; TIF/TAFfast: unpaced condition with movement as fast as possible; AllC: Contrast of all tapping conditions vs. all rest conditions; young: younger half of the study sample (n=16); old: older half of the study sample (n=15); stat: significance of the two-sample t-test comparing the older and younger half of the sample.

Figure S1: Depiction of the literature-based ROI-set. ROIs were created by drawing spheres with 10mm radius centered on peaks reported in an activation likelihood estimation[1]. Note the overlap of bilateral M1 and S1 ROIs (40% overlap).

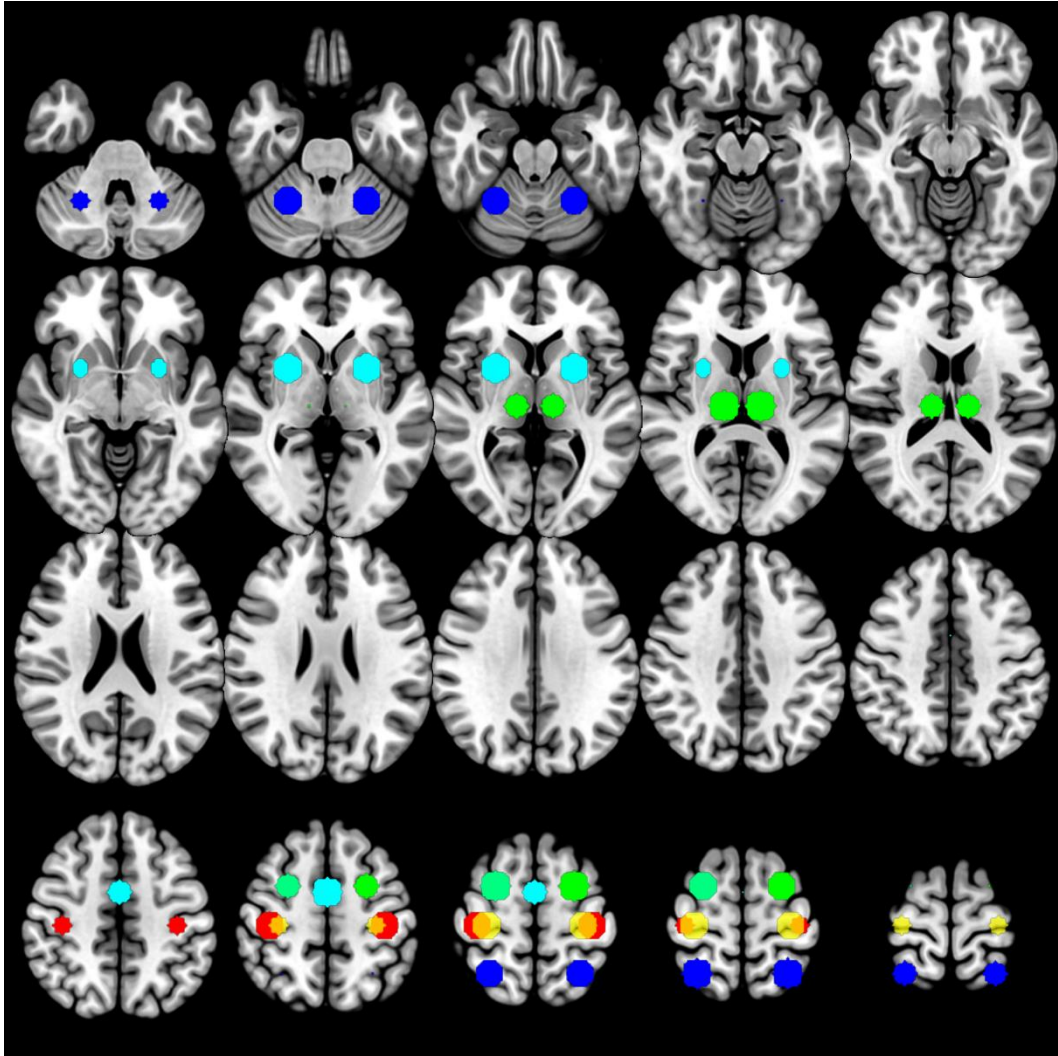

Figure S2: Depiction of the anatomical ROI-set from the AAL-atlas[2].

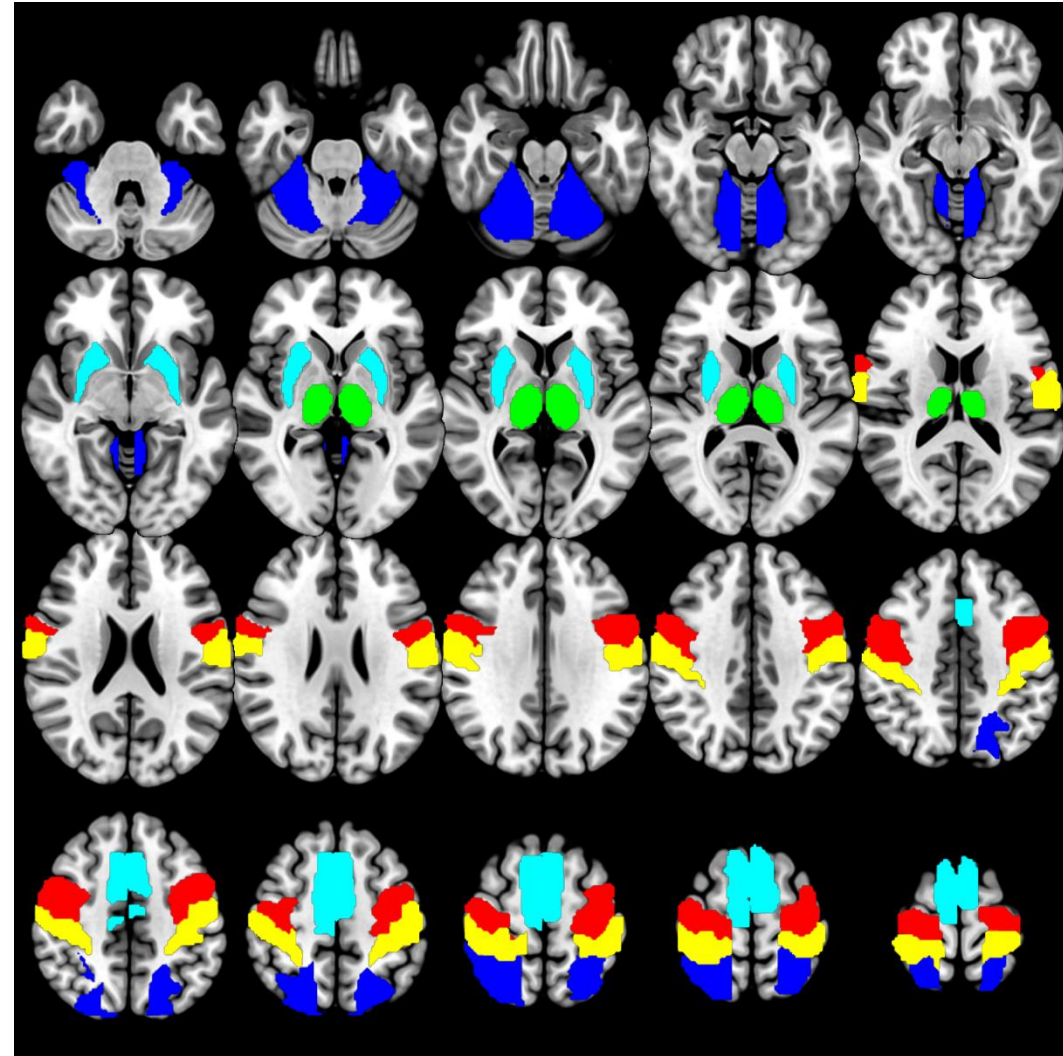

Figure S3: Depiction of ROIs derived from conjunction analysis of paced Thumb – Index Finger tapping vs. Listen contrast (TIF) at threshold  $p_{FWE} < .05$ .

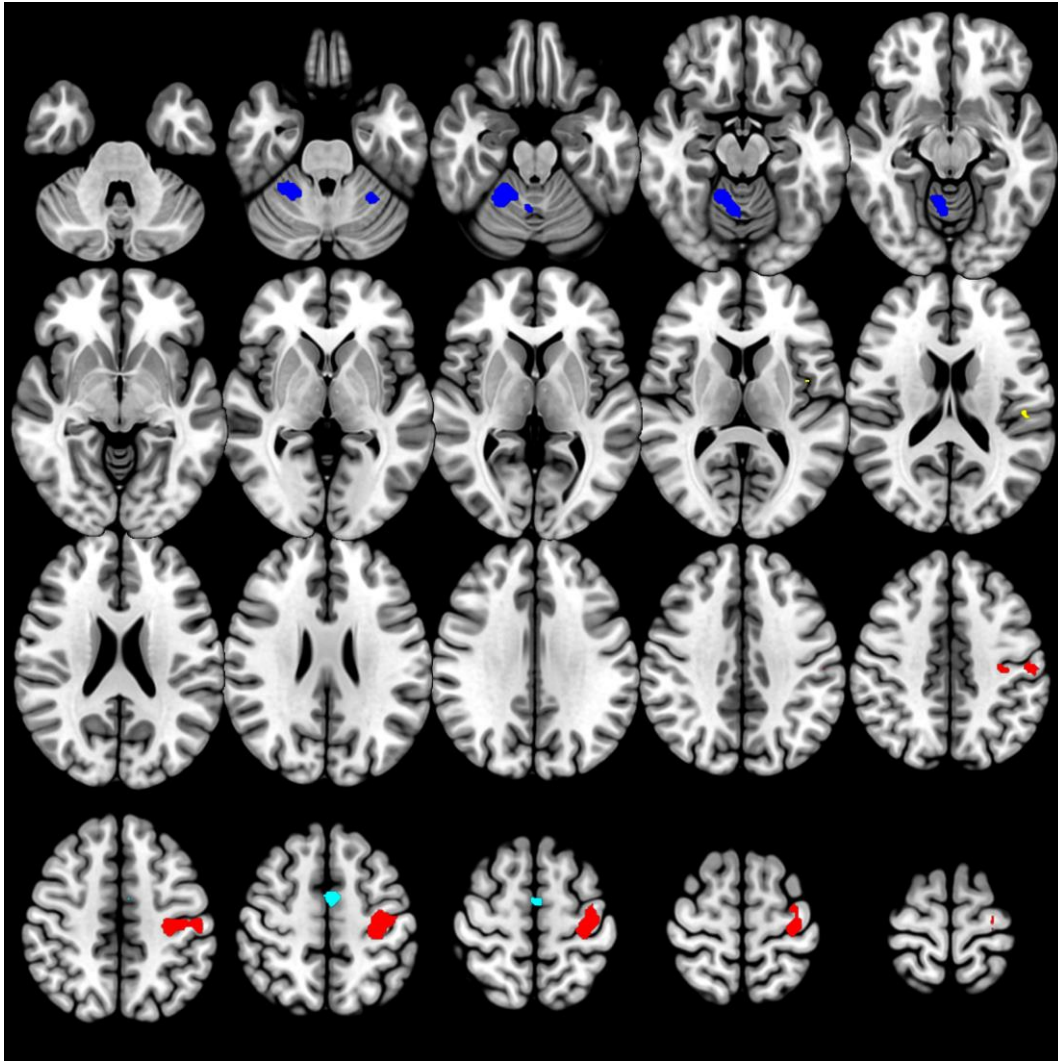

Figure S4: Depiction of ROIs derived from conjunction analysis of unpaced Thumb – Index Finger tapping vs. Rest contrast (TIFfast) at threshold  $p_{FWE} < .05$ .

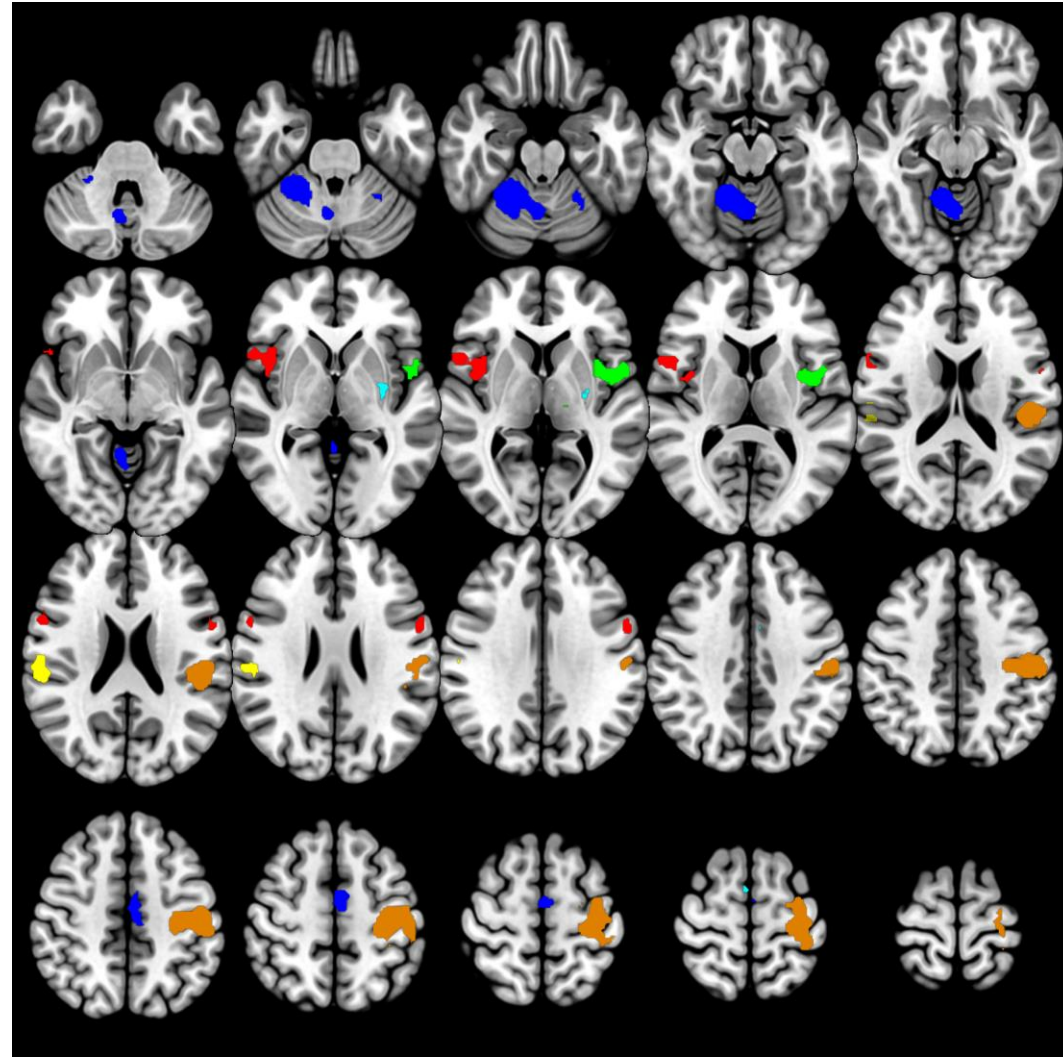



Figure S5: Depiction of ROIs derived from conjunction analysis of paced Thumb – Alternating Finger opposition vs. Listen contrast (TAF) at threshold  $p_{FWE} < .05$ .

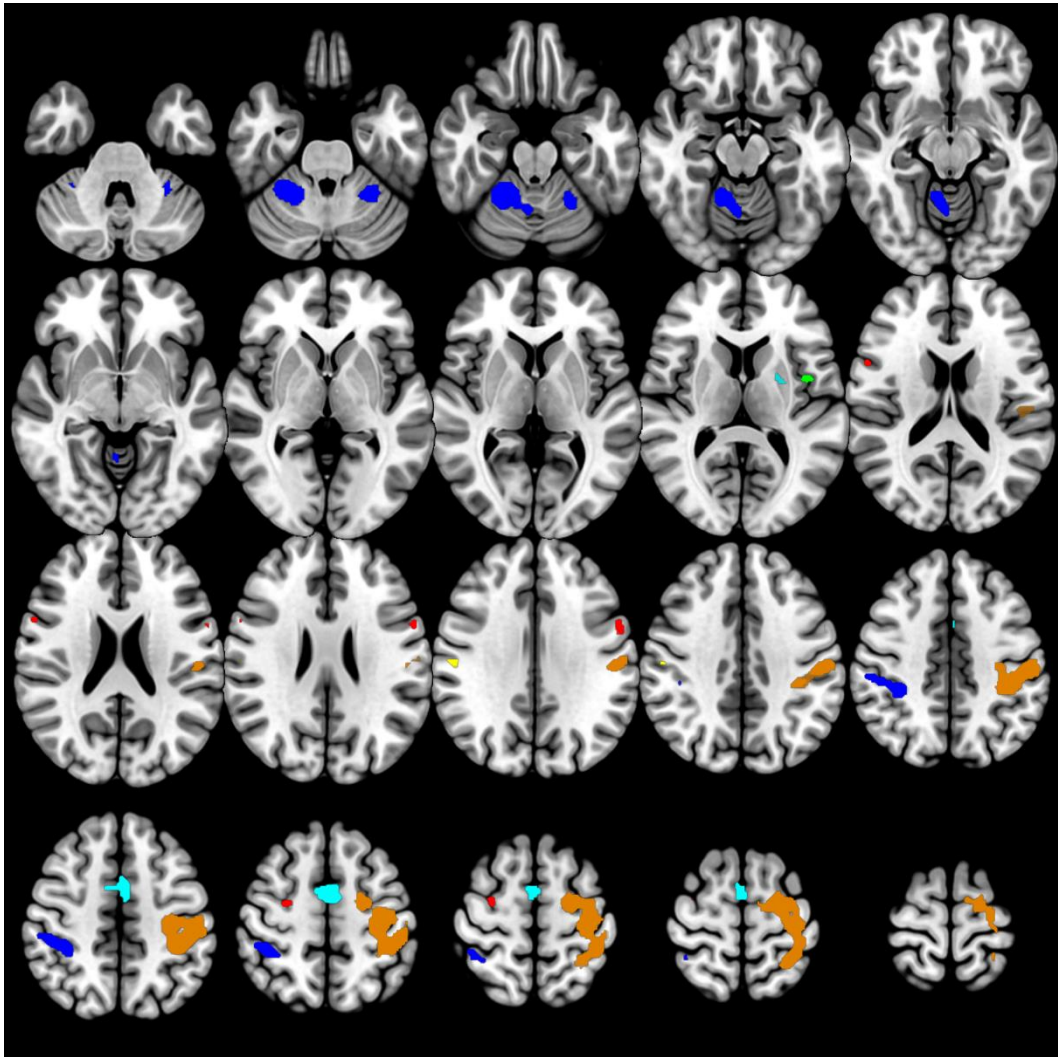

Figure S6: Depiction of ROIs derived from conjunction analysis of unpaced Thumb – Alternating Finger opposition vs. Rest contrast (TAFfast) at threshold  $p_{FWE} < .05$ .

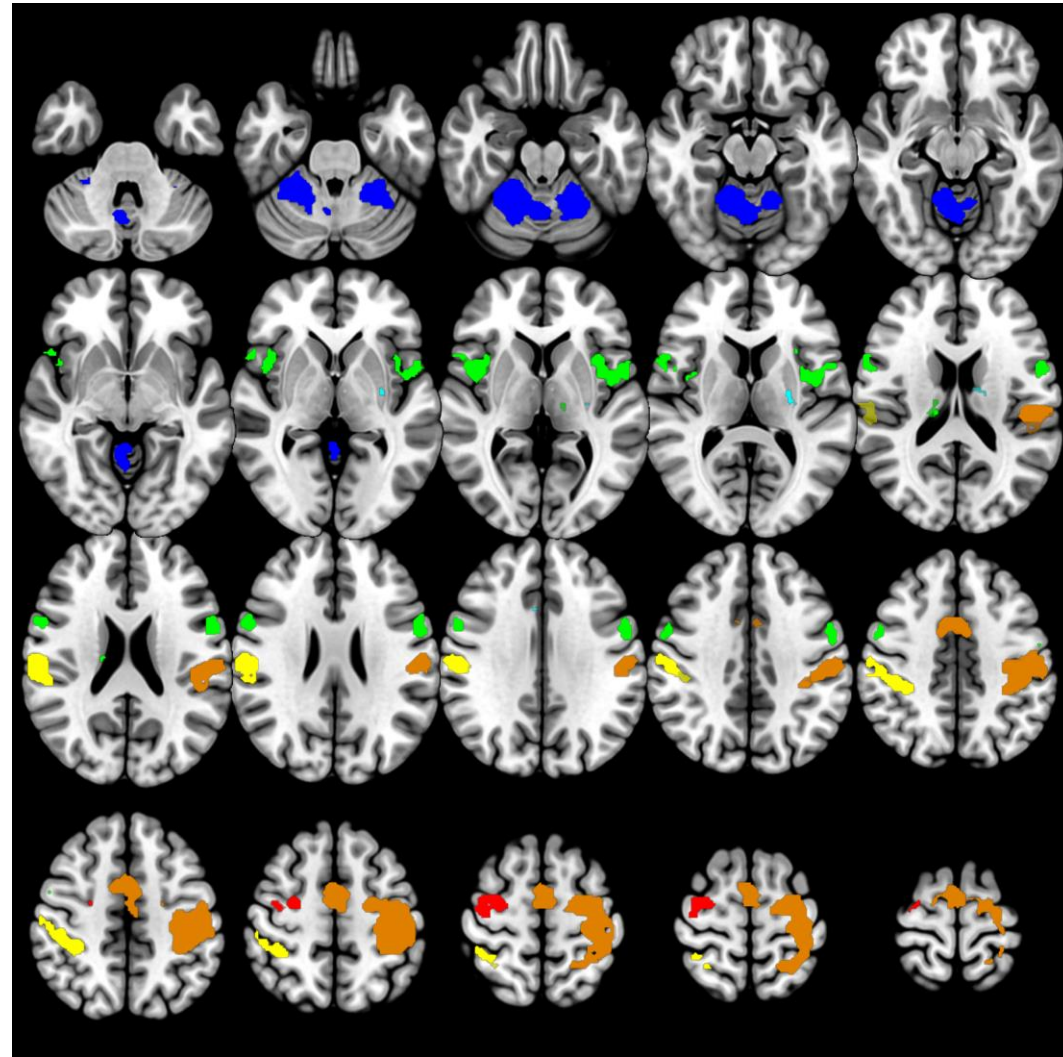

Figure S7: Depiction of ROIs derived from conjunction analysis of all tapping conditions vs. all rest conditions contrast (AIC) at threshold  $p_{FWE} < .05$ .

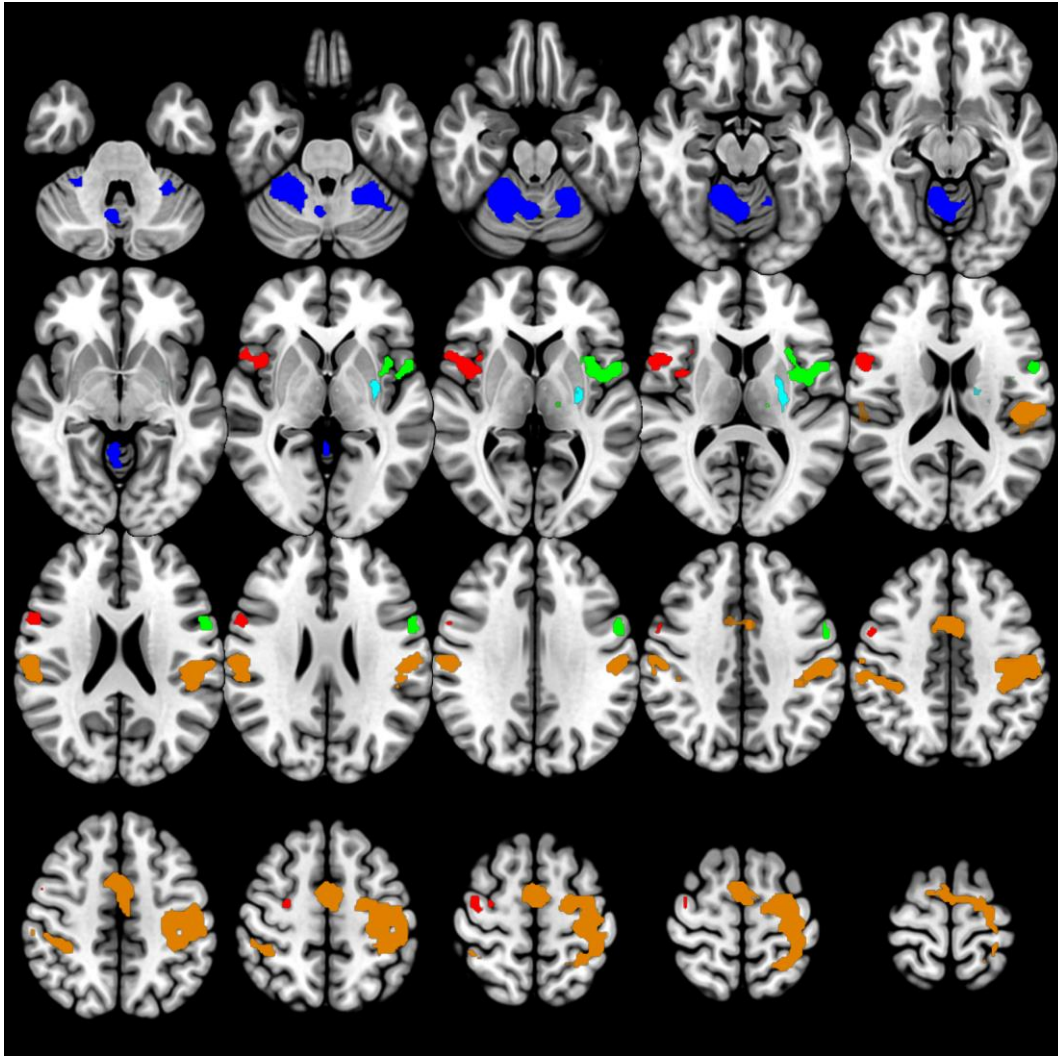

Figure S8: Overlay of ROI-sets. Red: Anatomical atlas ROIs; Yellow: Literature-based ROIs; Green: Example of conjunction analysis based ROIs (AIC) at threshold  $p_{FWE} < .05$ .

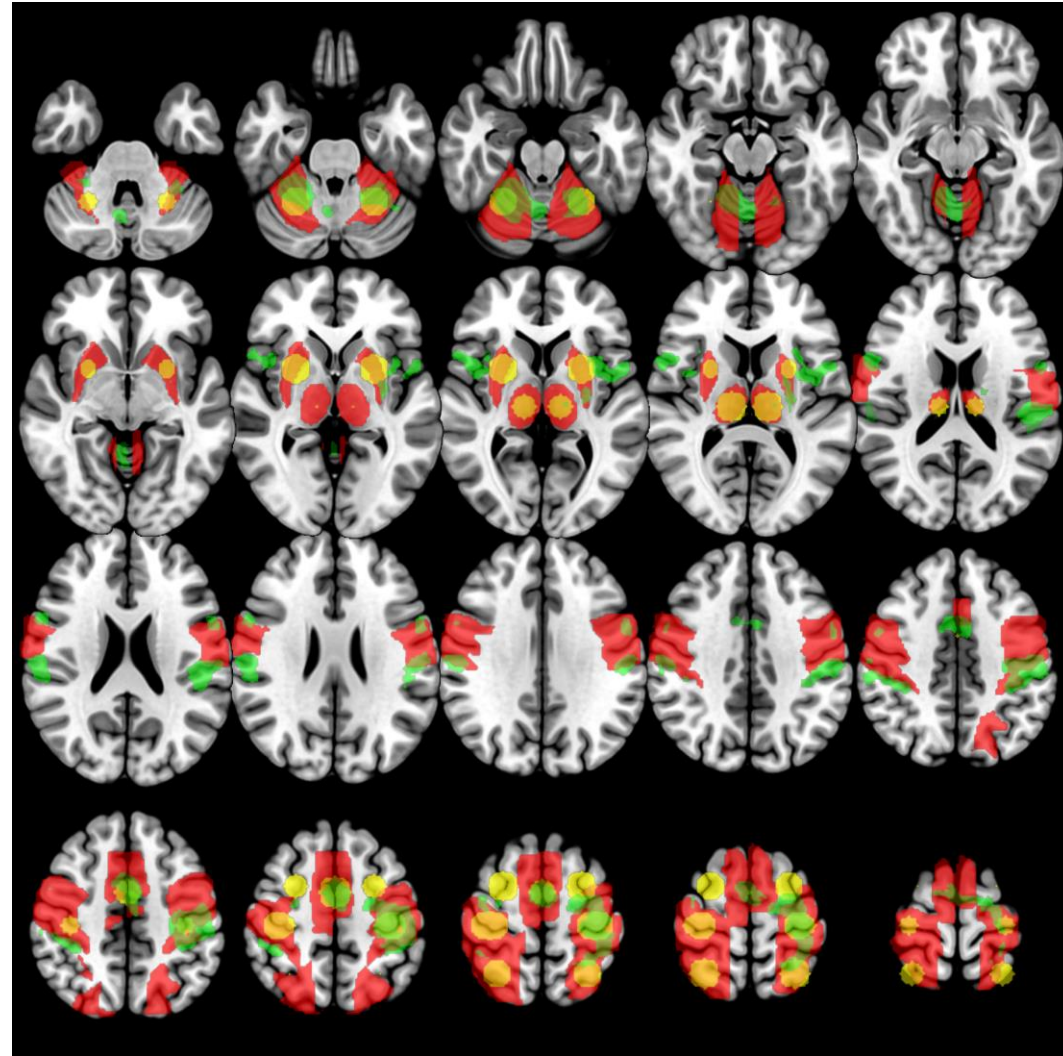

Figure S9: Side-by-side comparison of activation overlap by age group and contrast at threshold of  $p < .001$ . TIF: Paced thumb-index finger tapping; TAF: paced thumb alternating finger opposition; TIF/TAFfast: unpaced condition with movement as fast as possible; All: Contrast of all tapping conditions vs. all rest conditions; young: younger half of the study sample ( $n=16$ ); old: older half of the study sample ( $n=15$ ); DSC: Dice similarity coefficient.

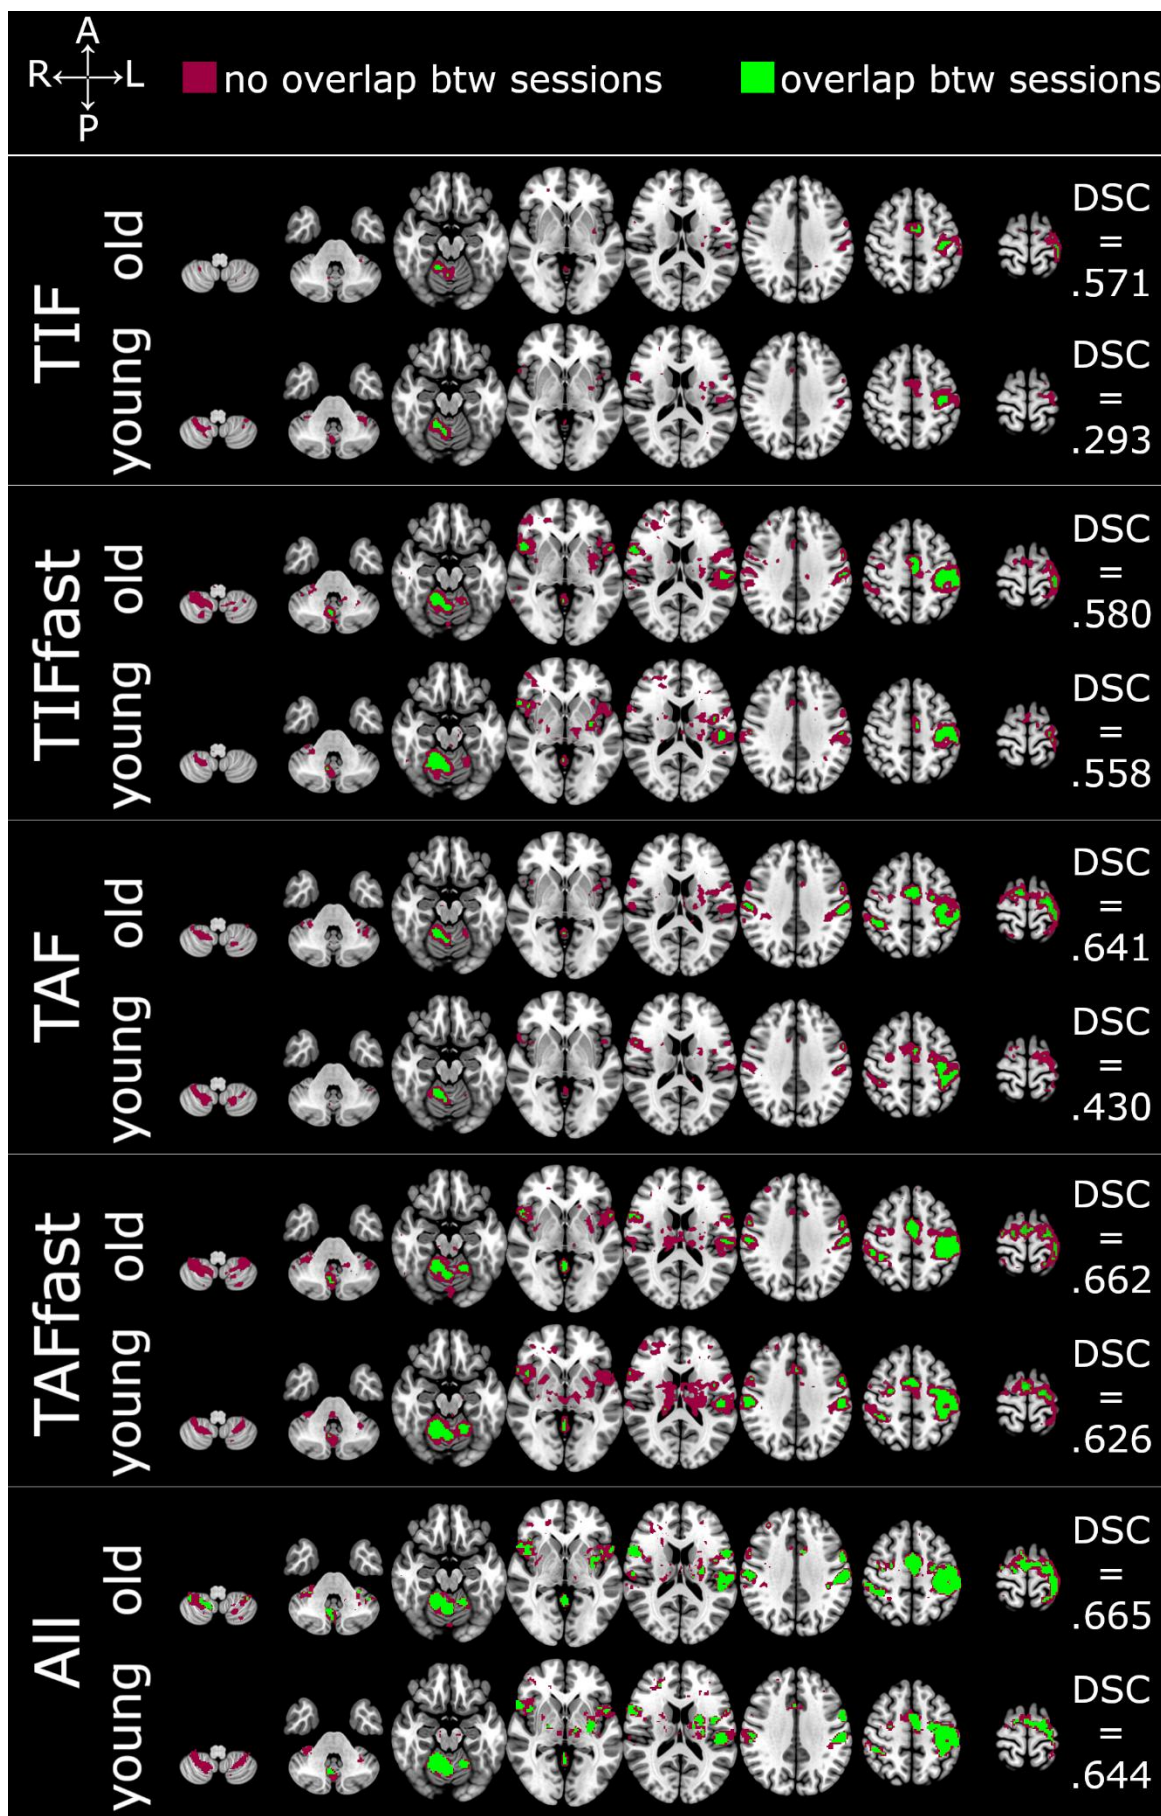

1. Hardwick, R.M., et al., *A quantitative meta-analysis and review of motor learning in the human brain*. Neuroimage, 2013. **67**: p. 283-97.
2. Tzourio-Mazoyer, N., et al., *Automated anatomical labeling of activations in SPM using a macroscopic anatomical parcellation of the MNI MRI single-subject brain*. Neuroimage, 2002. **15**(1): p. 273-89.
